# Supplementary material for: The risk factors for insomnia and sleep-disordered breathing in military communities: A meta-analysis
Source: PubMed Central journal article supplement (PMC8101965; doi:10.1371/journal.pone.0250779), 2021-05-06
Supplement: pone.0250779.s005.pdf [file pone.0250779.s005.pdf]

### 1.1.1 Publication bias of Male gender for SA risk in active duty personnel

Begg's Test

adj. Kendall's Score (P-Q) = 0  
 Std. Dev. of Score = 2.94  
 Number of Studies = 4  
 z = 0.00  
 Pr > |z| = 1.000  
 z = -0.34 (continuity corrected)  
 Pr > |z| = 1.000 (continuity corrected)

Egger's test

| Std_Eff | Coef.    | Std. Err. | t    | P> t  | [95% Conf. Interval] |          |
|---------|----------|-----------|------|-------|----------------------|----------|
| slope   | .761204  | .1010589  | 7.53 | 0.017 | .3263828             | 1.196025 |
| bias    | 1.396758 | 2.11707   | 0.66 | 0.577 | -7.712257            | 10.50577 |

### 1.1.2 Publication bias of overweight/obesity for SA risk in active duty personnel

Begg's Test

adj. Kendall's Score (P-Q) = -1  
 Std. Dev. of Score = 1.91  
 Number of Studies = 3  
 z = -0.52  
 Pr > |z| = 0.602  
 z = 0.00 (continuity corrected)  
 Pr > |z| = 1.000 (continuity corrected)

Egger's test

| Std_Eff | Coef.     | Std. Err. | t     | P> t  | [95% Conf. Interval] |          |
|---------|-----------|-----------|-------|-------|----------------------|----------|
| slope   | 1.171709  | .3745025  | 3.13  | 0.197 | -3.586796            | 5.930214 |
| bias    | -12.67983 | 31.13733  | -0.41 | 0.754 | -408.3172            | 382.9575 |

### 1.1.3 Publication bias of higher BMI for SA risk in active duty personnel

Begg's Test

adj. Kendall's Score (P-Q) = -2  
 Std. Dev. of Score = 2.94  
 Number of Studies = 4  
 z = -0.68  
 Pr > |z| = 0.497  
 z = 0.34 (continuity corrected)  
 Pr > |z| = 0.734 (continuity corrected)

Egger's test

| Std_Eff | Coef.     | Std. Err. | t     | P> t  | [95% Conf. Interval] |          |
|---------|-----------|-----------|-------|-------|----------------------|----------|
| slope   | .63298    | .0505691  | 12.52 | 0.006 | .415399              | .8505611 |
| bias    | -.1811568 | 2.740194  | -0.07 | 0.953 | -11.97126            | 11.60895 |

### 1.2.1 Publication bias of TBI for SA risk in active duty personnel

Harbord's modified test for small-study effects:

Regress  $Z/\sqrt{V}$  on  $\sqrt{V}$ , where Z is the efficient score and V is the score variance

Number of studies = 3 Root MSE = .3837

| Z/sqrt(V) | Coef.     | Std. Err. | t     | P> t  | [95% Conf. Interval] |          |
|-----------|-----------|-----------|-------|-------|----------------------|----------|
| sqrt(V)   | .3433741  | .0066146  | 51.91 | 0.012 | .259328              | .4274202 |
| bias      | -1.601022 | .2852649  | -5.61 | 0.112 | -5.225657            | 2.023612 |

Test of H0: no small-study effects P = 0.112



### 3.1.4 Publication bias of male gender for SA risk in veterans

Begg's Test

adj. Kendall's Score (P-Q) = -2  
 Std. Dev. of Score = 2.94  
 Number of Studies = 4  
 z = -0.68  
 Pr > |z| = 0.497  
 z = 0.34 (continuity corrected)  
 Pr > |z| = 0.734 (continuity corrected)

Egger's test

| Std_Eff | Coef.     | Std. Err. | t     | P> t  | [95% Conf. Interval] |          |
|---------|-----------|-----------|-------|-------|----------------------|----------|
| slope   | -.1786795 | .2343015  | -0.76 | 0.525 | -1.186797            | .8294383 |
| bias    | -2.595282 | 2.703334  | -0.96 | 0.438 | -14.22679            | 9.036227 |

### 3.2.1 Publication bias of deployment experience for insomnia risk in active duty

personnel

Begg's Test

adj. Kendall's Score (P-Q) = 2  
 Std. Dev. of Score = 2.94  
 Number of Studies = 4  
 z = 0.68  
 Pr > |z| = 0.497  
 z = 0.34 (continuity corrected)  
 Pr > |z| = 0.734 (continuity corrected)

Egger's test

| Std_Eff | Coef.    | Std. Err. | t    | P> t  | [95% Conf. Interval] |          |
|---------|----------|-----------|------|-------|----------------------|----------|
| slope   | .2406486 | .0807509  | 2.98 | 0.097 | -.1067944            | .5880916 |
| bias    | 1.732308 | 1.044848  | 1.66 | 0.239 | -2.76331             | 6.227927 |

### 3.3.1 Publication bias of depression for insomnia risk in active duty personnel

Begg's Test

adj. Kendall's Score (P-Q) = 1  
 Std. Dev. of Score = 1.91  
 Number of Studies = 3  
 z = 0.52  
 Pr > |z| = 0.602  
 z = 0.00 (continuity corrected)  
 Pr > |z| = 1.000 (continuity corrected)

Egger's test

| Std_Eff | Coef.    | Std. Err. | t     | P> t  | [95% Conf. Interval] |          |
|---------|----------|-----------|-------|-------|----------------------|----------|
| +-----  |          |           |       |       |                      |          |
| slope   | 1.065427 | .0764996  | 13.93 | 0.046 | .0934075             | 2.037446 |
| bias    | 6.38049  | 7.375057  | 0.87  | 0.546 | -87.3285             | 100.0895 |

### 3.3.3 Publication bias of TBI for insomnia risk in active duty personnel

Begg's Test

adj. Kendall's Score (P-Q) = 0  
 Std. Dev. of Score = 2.94  
 Number of Studies = 4  
 z = 0.00  
 Pr > |z| = 1.000  
 z = -0.34 (continuity corrected)  
 Pr > |z| = 1.000 (continuity corrected)

Egger's test

| Std_Eff | Coef.    | Std. Err. | t     | P> t  | [95% Conf. Interval] |          |
|---------|----------|-----------|-------|-------|----------------------|----------|
| +-----  |          |           |       |       |                      |          |
| slope   | .5825948 | .0092504  | 62.98 | 0.000 | .5427937             | .6223959 |
| bias    | -.212819 | 1.927286  | -0.11 | 0.922 | -8.50526             | 8.079622 |

### 3.3.3 Publication bias of TBI for insomnia risk in active duty personnel

Begg's Test

adj. Kendall's Score (P-Q) = 1  
 Std. Dev. of Score = 1.91  
 Number of Studies = 3  
 z = 0.52  
 Pr > |z| = 0.602  
 z = 0.00 (continuity corrected)  
 Pr > |z| = 1.000 (continuity corrected)

Egger's test

| Std_Eff | Coef.    | Std. Err. | t     | P> t  | [95% Conf. Interval] |          |
|---------|----------|-----------|-------|-------|----------------------|----------|
| slope   | 1.241792 | .0291441  | 42.61 | 0.015 | .8714812             | 1.612104 |
| bias    | 3.860566 | 5.611757  | 0.69  | 0.616 | -67.44356            | 75.16469 |

### 4.1.3 Publication bias of white race for insomnia risk in veterans

Begg's Test

adj. Kendall's Score (P-Q) = 3  
 Std. Dev. of Score = 1.91  
 Number of Studies = 3  
 z = 1.57  
 Pr > |z| = 0.117  
 z = 1.04 (continuity corrected)  
 Pr > |z| = 0.296 (continuity corrected)

Egger's test

| Std_Eff | Coef.     | Std. Err. | t      | P> t  | [95% Conf. Interval] |           |
|---------|-----------|-----------|--------|-------|----------------------|-----------|
| slope   | -.7379556 | .015854   | -46.55 | 0.014 | -.9394002            | -.5365109 |
| bias    | 2.338831  | .1316963  | 17.76  | 0.036 | .6654706             | 4.012192  |



### 4.3.1 Publication bias of TBI for insomnia risk in veterans

Harbord's modified test for small-study effects:

Regress  $Z/\sqrt{V}$  on  $\sqrt{V}$ , where  $Z$  is the efficient score and  $V$  is the score variance

Number of studies = 3 Root MSE = .4795

| $Z/\sqrt{V}$ | Coef.     | Std. Err. | t     | $P> t $ | [95% Conf. Interval] |          |
|--------------|-----------|-----------|-------|---------|----------------------|----------|
| +-----+      |           |           |       |         |                      |          |
| sqrt(V)      | .8972334  | .0487195  | 18.42 | 0.035   | .2781939             | 1.516273 |
|              |           |           |       |         |                      |          |
| bias         | -2.500315 | .4460618  | -5.61 | 0.112   | -8.168067            | 3.167438 |

Test of H0: no small-study effects P = 0.112
